# Supplementary material for: Prolonged growth and extended subadult development in the Tyrannosaurus rex species complex revealed by expanded histological sampling and statistical modeling
Source: PeerJ. 2026 Jan 14;14:e20469. doi: 10.7717/peerj.20469 (PMC12811967; doi:10.7717/peerj.20469)
Supplement: Supplemental Information 25 — Individual specimen tabs provide raw data tables for each growth series. [file peerj-14-20469-s025.xlsx]

## Sheet: Tibia MOR 1189
*Partial tibia missing proximal end
*Posterior half was crushed and not preserved with specimen. Surface outlines of DDM 35 and BMRP 2002.4.1 were used as proxys using Free Transform in Photoshop. A more distal section from MOR 1189 was also made, and this surface outline was also transformed as a template. All 3 outlines produced similar results.
*Midshaft circumference of 139.74 mm estimated from distal shaft circumference.
*Actual circumference of distal shaft 151.09 mm.
*Midshaft circumference of 141.74 estimated from using DDM 35 and BMRP 2002.4.1 as templates.
*Medullary cavity circumference estimated from transformed distal tibia section of MOR 1189.
CGM Notes	CGM Number (age independent)	CGM Number Ignoring Multiplets	Circumference (mm)	Total Area (mm2)	Area of Cortical Zone Between CGMs (mm2)	Transverse Section Centroid (XY pixel coordinates in Photoshop)	Transverse Section Major Axis Theta	Major Axis Degrees from Horizontal	Distance from Centroid to CGM on Major Axis 1 (mm)	Distance from Centroid to CGM on Major Axis 2 (mm)	Distance from Centroid to CGM on Minor Axis 1 (mm)	Distance from Centroid to CGM on Minor Axis 2 (mm)	Average Total Thickness from Centroid to CGM (mm)	Average Cortical Zone Thickness (mm)
Estimated from medullary cavity of distal section	Medullary Cavity	Medullary Cavity	78.98	428.85					14.88	10.27	9.52	11.84
	1	1	71.83	338.17					12.75	9.06	9.66	7.8	9.8175
Multiplet	2		80.51	429.56	91.39				14.97	10.24	10.54	8.66	11.1025	1.285
Multiplet	3	2	83.56	460.55	30.99				15.47	10.96	10.87	8.9	11.55	0.4475
Double LAG	4	3	96.85	615.77	155.22				17.37	13.73	12.38	10.8	13.57	2.02
Multiplet	5		110.21	811.95	196.18				19.25	16.54	13.94	13.42	15.7875	2.2175
Multiplet; Double LAG	6	4	112.99	852.69	40.74				19.66	17.21	14.18	13.73	16.195	0.4075
Multiplet; Double LAG	7		122.8	1019.11	166.42				21.17	19.52	15.13	15.58	17.85	1.655
Multiplet	8	5	124.18	1050.26	31.15				21.55	19.8	15.31	15.85	18.1275	0.2775
Multiplet	9		140.16	1349.33	299.07				23.88	23.33	16.74	19	20.7375	2.61
Multiplet	10	6	141.53	1368.21	18.88				23.98	23.46	16.88	19.13	20.8625	0.125
	Periosteal Surface	Periosteal Surface	141.74	1380.35		19185.898, 17355.742	0.065	3.72	24.09	23.54	16.97	19.18	20.945

## Sheet: Tibia DDM 35
CGM Notes	CGM Number (age independent)	CGM Number Ignoring Multiplets	Circumference (mm)	Total Area (mm2)	Area of Cortical Zone Between CGMs (mm2)	Transverse Section Centroid (XY pixel coordinates in Photoshop)	Transverse Section Major Axis Theta	Major Axis Degrees from Horizontal	Distance from Centroid to CGM on Major Axis 1 (mm)	Distance from Centroid to CGM on Major Axis 2 (mm)	Distance from Centroid to CGM on Minor Axis 1 (mm)	Distance from Centroid to CGM on Minor Axis 2 (mm)	Average Total Thickness from Centroid to CGM (mm)	Average Cortical Zone Thickness (mm)
	Medullary Cavity	Medullary Cavity	102.45	691.01					18.78	16.03	12.5	12.85	15.04
Multiplet	1	1	99.9	680.63					18.28	15.86	12.87	11.32	14.5825
Multiplet	2		102	710.16	29.53				18.74	16.16	13.13	11.59	14.905	0.3225
	3	2	124.1	1051	340.84				20.7	18.8	15.7	14.8	17.5	2.595
Multiplet	4		148.2	1493	442				24.3	21.7	18.7	18	20.675	3.175
Multiplet	5	3	150.1	1531	38				24.5	26.2	18.9	18.2	21.95	1.275
	6	4	161	1768	237				26.2	29	20.2	19.6	23.75	1.8
	Periosteal Surface	Periosteal Surface	164	1832		16918.275, 13271.304	0.074	4.23989	26.6	29.5	20.5	20	24.15

## Sheet: Tibia BMRP 2002.4.1
*Associated fragmentary femur preserves 13 CGMs
CGM Notes	CGM Number (age independent)	CGM Number Ignoring Multiplets	Circumference (mm)	Total Area (mm2)	Area of Cortical Zone Between CGMs (mm2)	Transverse Section Centroid (XY pixel coordinates in Photoshop)	Transverse Section Major Axis Theta	Major Axis Degrees from Horizontal	Distance from Centroid to CGM on Major Axis 1 (mm)	Distance from Centroid to CGM on Major Axis 2 (mm)	Distance from Centroid to CGM on Minor Axis 1 (mm)	Distance from Centroid to CGM on Minor Axis 2 (mm)	Average Total Thickness from Centroid to CGM (mm)	Average Cortical Zone Thickness (mm)
	Medullary Cavity	Medullary Cavity	150.57	1513.77					23.2	22.8	19.1	18.9
Multiplet	1		137.94	1252.94					20.8	20.6	19.4	14.5	18.825
Multiplet	2	1	140.68	1303.38					21.2	21	19.6	14.9	19.175	0.35
	3	2	153.36	1539.16					23.5	22.8	20.3	16.9	20.875	1.7
	4	3	164.69	1788.82					25.3	24.8	21.3	18.8	22.55	1.675
	5	4	171.44	1914.85					25.6	25.9	21.9	19.8	23.3	0.75
	6	5	181.7	2178.92					26.8	28.3	22.8	21.4	24.825	1.525
	7	6	190.86	2375.27					27.8	30	23.9	22.6	26.075	1.25
Multiplet	8		200.59	2617.62					28.7	31.8	24.6	24.8	27.475	1.4
Multiplet	9	7	202.89	2669.47					29	32.4	24.8	25	27.8	0.325
Double LAG	10	8	217.73	3067.26					31	34.9	26	27.7	29.9	2.1
	11	9	226.42	3321.62					32.1	36.6	26.6	29.6	31.225	1.325
	12	10	233.43	3517.7					32.7	37.8	27.3	30.9	32.175	0.95
CGM so close to surface sometimes merges with it	13	11	240.19	3694.55					33.4	38.7	27.7	32.3	33.025	0.85
	Periosteal Surface	Periosteal Surface	240.19			18132.15, 15837.664	0.619	35.47	33.4	38.7	27.7	32.3	33.025

## Sheet: Tibia BMRP 2006.4.4
*Incomplete, proximal end only
*Section taken very proximally and includes fibular crest, which may alter true circumference measurements
CGM Notes	CGM Number (age independent)	CGM Number Ignoring Multiplets	Circumference (mm)	Total Area (mm2)	Area of Cortical Zone Between CGMs (mm2)	Transverse Section Centroid (XY pixel coordinates in Photoshop)	Transverse Section Major Axis Theta	Major Axis Degrees from Horizontal	Distance from Centroid to CGM on Major Axis 1 (mm)	Distance from Centroid to CGM on Major Axis 2 (mm)	Distance from Centroid to CGM on Minor Axis 1 (mm)	Distance from Centroid to CGM on Minor Axis 2 (mm)	Average Total Thickness from Centroid to CGM (mm)	Average Cortical Zone Thickness (mm)
	Medullary Cavity	Medullary Cavity	165	1557.66					23.56	24.3	15.7	24.4
XPL only; partial	1	1
Multiplet	2		156.8	1505					20.11	24.85	17.24	20.78	20.745
Multiplet	3		158	1530	25				20.39	24.94	17.34	21.05	20.93	0.185
Multiplet	4	2	159.5	1555	25				20.6	25.07	17.4	21.27	21.085	0.155
Multiplet	5		161.7	1599	44				21.19	25.3	17.62	21.63	21.435	0.35
Multiplet	6		163.8	1638	39				21.58	25.42	17.72	22.11	21.7075	0.2725
Multiplet	7	3	165.6	1670	32				21.86	25.62	17.91	22.32	21.9275	0.22
XPL only	8	4	177.91	1896.39	226.39				23.87	26.16	18.76	25.07	23.465	1.5375
	9	5	184.3	2051	154.61				24.63	27.71	19.32	25.86	24.38	0.915
XPL only	10	6	191.58	2190.43	139.43				25.18	28.93	20.27	26.73	25.2775	0.8975
XPL only	11		202.21	2501.76	311.33				26.45	30.64	21.84	28.85	26.945	1.6675
Multiplet	12	7	206.1	2606	104.24				26.97	31.43	22.12	29.49	27.5025	0.5575
	13	8	214.5	2807	201				28.36	32.32	22.98	30.6	28.565	1.0625
Multiplet	14		224.5	3081	274				30.35	33.73	23.94	31.82	29.96	1.395
Multiplet	15	9	227	3158	77				30.68	33.92	24.74	32.11	30.3625	0.4025
XPL only	16	10	236.89	3426.61	268.61				32.37	34.99	25.73	33.43	31.63	1.2675
	17	11	244	3647	220.39				33.65	36.21	26.52	34.49	32.7175	1.0875
Multiplet	18		249.5	3810	163				34.94	36.9	26.9	35.06	33.45	0.7325
Multiplet	19		251.7	3881	71				35.29	37.2	27.43	35.41	33.8325	0.3825
Multiplet	20	12	253.3	3934	53				35.49	37.32	27.83	35.59	34.0575	0.225
	21		258.3	4091	157				36.19	37.99	28.61	36.2	34.7475	0.69
Multiplet	22		261.9	4216	125				37.28	38.59	28.85	36.72	35.36	0.6125
Multiplet	23	13	263.7	4274	58				37.57	38.73	29.22	36.87	35.5975	0.2375
	Periosteal Surface	Periosteal Surface	265.7	4334					37.75	38.87	29.93	37.02	35.8925

## Sheet: Femur BMRP 2006.4.4
*Femur sample taken at minimum diaphysis so it does not have the same CGM issue that the tibia does due to the fibular crest, so 15 CGMs may be the more realistic count
CGM Notes	CGM Number (age independent)	CGM Number Ignoring Multiplets	Circumference (mm)	Total Area (mm2)	Area of Cortical Zone Between CGMs (mm2)	Transverse Section Centroid (XY pixel coordinates in Photoshop)	Transverse Section Major Axis Theta	Major Axis Degrees from Horizontal	Distance from Centroid to CGM on Major Axis 1 (mm)	Distance from Centroid to CGM on Major Axis 2 (mm)	Distance from Centroid to CGM on Minor Axis 1 (mm)	Distance from Centroid to CGM on Minor Axis 2 (mm)	Average Total Thickness from Centroid to CGM (mm)	Average Cortical Zone Thickness (mm)
	Medullary Cavity	Medullary Cavity	163.99	1833.6					26.63	25.52	23.49	20.94
Multiplet	1		157.1	1741					26.9	23.08	25.22	18.23	23.3575
Multiplet	2	1	158.4	1771	30				27.2	23.27	25.6	18.33	23.6	0.2425
Double LAG	3	2	170.8	2052	281				28.7	24.82	27.1	19.93	25.1375	1.5375
XPL only	4	3	196.3	2690	638				31.3	29.97	29.54	24.6	28.8525	3.715
	5	4	202.9	2867	177				32.3	31.08	30.33	25.62	29.8325	0.98
Multiplet; Double LAG	6		213.7	3182	315				33.6	33.23	31.74	27.05	31.405	1.5725
Multiplet	7	5	216.5	3275	93				33.9	33.63	32.06	28	31.8975	0.4925
	8	6	232.3	3776	501				36	37.12	34.15	30.48	34.4375	2.54
	9	7	238.6	4006	230				37.06	38.4	34.82	31.82	35.525	1.0875
	10	8	241.9	4107	101				37.21	38.85	35.07	32.38	35.8775	0.3525
	11	9	244.1	4179	72				37.43	39.29	35.27	32.73	36.18	0.3025
	12	10	248.5	4342	163				38.12	40.26	35.95	33.74	37.0175	0.8375
Double LAG	13	11	253.5	4519	177				38.84	41.42	36.6	34.41	37.8175	0.8
Multiplet	14		256.4	4621	102				39.04	41.99	36.92	34.91	38.215	0.3975
Multiplet; CGM so close to surface it often merges with it	15	12	257.21	4655.47	34.47				39.16	42.17	37.12	35.11	38.39	0.175
	Periosteal Surface	Periosteal Surface	257.2	4658					39.16	42.17	37.12	35.11	38.39

## Sheet: Tibia MOR 9757
CGM Notes	CGM Number (age independent)	CGM Number Ignoring Multiplets	Circumference (mm)	Total Area (mm2)	Area of Cortical Zone Between CGMs (mm2)	Transverse Section Centroid (XY pixel coordinates in Photoshop)	Transverse Section Major Axis Theta	Major Axis Degrees from Horizontal	Distance from Centroid to CGM on Major Axis 1 (mm)	Distance from Centroid to CGM on Major Axis 2 (mm)	Distance from Centroid to CGM on Minor Axis 1 (mm)	Distance from Centroid to CGM on Minor Axis 2 (mm)	Average Total Thickness from Centroid to CGM (mm)	Average Cortical Zone Thickness (mm)
	Medullary Cavity	Medullary Cavity	194.2	2575					34.8	30.98	18.77	30.09	28.66
	1	1	154.449	1590.56					29.1	20.7	21.5	16.3	21.9
	2	2	163.95	1774.38	1619.93				32.68	21.31	21.97	17.6	23.39	1.49
	3	3	190.12	2380.26	2216.31				34.79	26.29	23	25.01	27.2725	3.8825
Double LAG	4	4	226.89	3328.99	3138.87				39.49	34.75	27.24	27.98	32.365	5.0925
	5	5	247.52	4148.23	3921.34				43.93	38.58	30.48	32.23	36.305	3.94
	6	6	269.89	4829.16	4581.64				47.5	42.06	32.04	35.72	39.33	3.025
Double LAG	7	7	280.744	5225.28	4955.39				49.1	44.5	33.09	37.2	40.9725	1.6425
	8	8	291.902	5680.32	5399.58				50.1	46.4	34.56	38.85	42.4775	1.505
Triple LAG	9	9	298.54	5952.8	5660.9				51.2	47.7	35.41	39.9	43.5525	1.075
	10	10	306.979	6304	6005.46				52.8	49.2	36.54	41.2	44.935	1.3825
Multiplet	11		310.298	6557.76	6250.78				53.9	50.2	37.15	41.6	45.7125	0.7775
Multiplet	12	11	317.15	6637.17	6326.87				54.5	50.6	37.39	41.8	46.0725	0.36
	Periosteal Surface	Periosteal Surface	314.36	6727.43	6410.28	18225.893, 15579.974	0.096	5.5	54.6	50.9	37.72	42.2	46.355

## Sheet: Tibia MOR 009
CGM Notes	CGM Number (age independent)	CGM Number Ignoring Multiplets	Circumference (mm)	Total Area (mm2)	Area of Cortical Zone Between CGMs (mm2)	Transverse Section Centroid (XY pixel coordinates in Photoshop)	Transverse Section Major Axis Theta	Major Axis Degrees from Horizontal	Distance from Centroid to CGM on Major Axis 1 (mm)	Distance from Centroid to CGM on Major Axis 2 (mm)	Distance from Centroid to CGM on Minor Axis 1 (mm)	Distance from Centroid to CGM on Minor Axis 2 (mm)	Average Total Thickness from Centroid to CGM (mm)	Average Cortical Zone Thickness (mm)
	Medullary Cavity	Medullary Cavity	282.1	5274.73					49.87	45.07	32.87	37.37	41.295
	1	1	202.3	2809.2					37.3	24.88	33.5	17.23	28.2275
	2	2	205.72	2904	94.8				38.28	25.31	33.76	17.78	28.7825	0.555
	3	3	212.75	3100.72	196.72				38.96	27.15	34.51	18.8	29.855	1.0725
	4	4	220.29	3320.34	219.62				40.32	29.16	34.7	20.56	31.185	1.33
	5	5	242.83	4015.21	694.87				47.5	31.51	35.65	25.24	34.975	3.79
Double LAG	6	6	245.59	4104.58	89.37				47.9	32	36.05	25.53	35.37	0.395
	7	7	255.12	4447.47	342.89				50.02	34.23	36.38	27.53	37.04	1.67
XPL only	8	8	264.94	4821.1	373.63				52.41	35.63	37.5	28.28	38.455	1.415
XPL only	9	9	277.13	5277.52	456.42				54.5	38.06	38.66	30.3	40.38	1.925
XPL only	10	10	312.46	6693.33	1415.81				59.42	46.22	41.76	36.29	45.9225	5.5425
Multiplet	11		350.2	8387.74	1694.41				64.89	54.9	44.43	43.23	51.8625	5.94
Multiplet	12		353.86	8554.74	167				65.42	55.66	44.72	43.76	52.39	0.5275
Multiplet	13	11	355.7	8654.13	99.39				65.75	55.86	44.93	44.25	52.6975	0.3075
XPL only	14	12	371.22	9426.97	772.84				67.36	57.32	46.67	48.04	54.8475	2.15
	15	13	386.86	10251.6	824.66				69.8	61.45	47.76	50.23	57.31	2.4625
Multiplet	16		420.63	12189	1937.4				73.35	67.52	51.59	56.66	62.28	4.97
Multiplet	17	14	422.84	12332.8	143.79				73.73	67.67	51.95	57.21	62.64	0.36
	Periosteal Surface	Periosteal Surface	440.32	13195.3		14741.299, 11038.24	0.084	4.81285	75.56	71.32	53	59.42	64.825

## Sheet: Tibia MOR 2949
CGM Notes	CGM Number (age independent)	CGM Number Ignoring Multiplets	Circumference (mm)	Total Area (mm2)	Area of Cortical Zone Between CGMs (mm2)	Transverse Section Centroid (XY pixel coordinates in Photoshop)	Transverse Section Major Axis Theta	Major Axis Degrees from Horizontal	Distance from Centroid to CGM on Major Axis 1 (mm)	Distance from Centroid to CGM on Major Axis 2 (mm)	Distance from Centroid to CGM on Minor Axis 1 (mm)	Distance from Centroid to CGM on Minor Axis 2 (mm)	Average Total Thickness from Centroid to CGM (mm)	Average Cortical Zone Thickness (mm)
	Medullary Cavity	Medullary Cavity	296.56	5515.37					56.44	46.03	32.74	30.07
Multiplet	1		302.72	5956.26					61.03	45.46	35.14	34.74	44.0925
Multiplet	2	1	305.28	6051.12	94.86				61.67	45.84	35.39	34.92	44.455	0.3625
Multiplet	3		313.93	6448.44	397.32				62.85	47.11	36.47	37.05	45.87	1.415
Multiplet	4		317.16	6581.91	133.47				63.23	48.14	36.64	37.49	46.375	0.505
Multiplet	5	2	321.57	6732.76	150.85				64.48	49.03	37	37.65	47.04	0.665
Multiplet	6		351.14	8053.07	1320.31				69.3	54.88	40.4	40.96	51.385	4.345
Multiplet	7	3	353.92	8157.58	104.51				69.75	55.32	40.62	41.25	51.735	0.35
	8	4	393.95	10277.8	2120.23				75.71	61.96	44.71	46.55	57.2325	5.4975
Multiplet	9		425.45	11907.3	1629.5				79.52	68.3	47.87	51.1	61.6975	4.465
Multiplet	10	5	428.72	12121.3	214.02				80.07	68.53	48.82	52	62.355	0.6575
Multiplet	11		458.6	13719.1	1597.78				82.09	73	51.63	55.97	65.6725	3.3175
Multiplet	12	6	460.82	13849.3	130.19				82.45	73.42	51.81	56.27	65.9875	0.315
Multiplet	13		470.63	14415.7	566.43				83.48	75.23	52.93	57.29	67.2325	1.245
Multiplet	14	7	472.11	14570.4	154.63				84.14	75.45	53.2	57.67	67.615	0.3825
	15	8	486.55	15568.7	998.37				85.61	78.62	54.68	59.19	69.525	1.91
	Periosteal Surface	Periosteal Surface	508.39	16841		16529.403, 10911.37	-0.1	-5.72958	89.35	82.83	56.36	61.4	72.485

## Sheet: Tibia USNM 555000
CGM Notes	CGM Number (age independent)	CGM Number Ignoring Multiplets	Circumference (mm)	Total Area (mm2)	Area of Cortical Zone Between CGMs (mm2)	Transverse Section Centroid (XY pixel coordinates in Photoshop)	Transverse Section Major Axis Theta	Major Axis Degrees from Horizontal	Distance from Centroid to CGM on Major Axis 1 (mm)	Distance from Centroid to CGM on Major Axis 2 (mm)	Distance from Centroid to CGM on Minor Axis 1 (mm)	Distance from Centroid to CGM on Minor Axis 2 (mm)	Average Total Thickness from Centroid to CGM (mm)	Average Cortical Zone Thickness (mm)
Anterior and medial sides missing, so values were estimated	Medullary Cavity	Medullary Cavity	301.26	6228.18					55.56	46	35.54	39.8
XPL only	1	1	351.93	8567.36					67.12	48.95	50.11	42.04	52.055
	2	2	365.14	9199.58	632.22				68.08	52.36	52.25	43.15	53.96	1.905
XPL only	3	3	379.2	9901.21	701.63				71.48	54.21	53.08	45.65	56.105	2.145
XPL only	4	4	389.33	10459.6	558.44				73.41	56.13	53.88	47.78	57.8	1.695
XPL only	5	5	398.37	10950.9	491.24				74.18	58.29	54.62	49.39	59.12	1.32
	6	6	406.53	11384.8	433.91				75.2	60.7	55.47	50.41	60.445	1.325
XPL only	7	7	422.53	12268.2	883.39				78.57	64.72	56.04	52.9	63.0575	2.6125
	8	8	442.62	13456	1187.78				80.1	69.17	57.65	56.37	65.8225	2.765
	9	9	462.32	14646.2	1190.24				82.6	74	58.76	59.52	68.72	2.8975
XPL only	10	10	475.7	15513.1	866.86				84.22	77.55	59.45	61.97	70.7975	2.0775
	11	11	489.35	16255.1	742				86.33	80.17	59.71	63.51	72.43	1.6325
Multiplet	12		497.27	16813.4	558.36				87.74	82.51	60.49	64.36	73.775	1.345
Multiplet	13	12	502.5	17258	444.57				88.41	83.52	61.09	65.35	74.5925	0.8175
	Periosteal Surface	Periosteal Surface	512.95		-17258	7572.644, 5532.292	0.173	9.91	89.31	85.17	63.61	66.09	76.045

## Sheet: Femur MOR 1125
CGM Notes	CGM Number (age independent)	CGM Number Ignoring Multiplets	Circumference (mm)	Total Area (mm2)	Area of Cortical Zone Between CGMs (mm2)	Transverse Section Centroid (XY pixel coordinates in Photoshop)	Transverse Section Major Axis Theta	Major Axis Degrees from Horizontal	Distance from Centroid to CGM on Major Axis 1 (mm)	Distance from Centroid to CGM on Major Axis 2 (mm)	Distance from Centroid to CGM on Minor Axis 1 (mm)	Distance from Centroid to CGM on Minor Axis 2 (mm)	Average Total Thickness from Centroid to CGM (mm)	Average Cortical Zone Thickness (mm)
	Medullary Cavity	Medullary Cavity	265.56	4618.83					36.32	47.63	37.8	33.47
	1	1	286.84	5706.65					42.52	51.55	43.05	35.22	43.085
	2	2	315.57	6852.64	1145.99				48.42	56.93	46.34	37.42	47.2775	4.1925
	3	3	330.95	7526.61	673.97				51.59	59.8	47.65	39.29	49.5825	2.305
	4	4	356.63	8756.39	1229.78				55.62	62.78	52.77	42.22	53.3475	3.765
	5	5	390.25	10509.6	1753.19				62.45	66.57	56.74	47.81	58.3925	5.045
	6	6	407.28	11440.5	930.94				65.05	68.85	59.02	50.19	60.7775	2.385
	7	7	428.83	12705.4	1264.88				68.22	72.66	61.86	54.05	64.1975	3.42
	8	8	451.75	14135.1	1429.75				71.49	76.53	65.49	58.53	68.01	3.8125
	9	9	474.09	15544	1408.84				74.38	81.11	66.85	63.53	71.4675	3.4575
Multiplet	10		494.06	16960.4	1416.42				81.15	82.7	68.88	65.1	74.4575	2.99
Multiplet	11	10	498.68	17245.6	285.17				81.81	83.65	69.36	65.62	75.11	0.6525
Multiplet	12		506.44	17755.2	509.63				83.34	85.23	70.59	66.06	76.305	1.195
Multiplet; Triple LAG	13	11	512.1	18046.2	290.95				83.98	85.74	71.1	66.93	76.9375	0.6325
	14	12	524.94	18965	918.89				84.98	89.31	72.49	68.32	78.775	1.8375
Triple LAG	15	13	534.09	19642.4	677.37				87.52	90.54	73.21	69.52	80.1975	1.4225
CGM 16-18 too fragmentary to measure	16	14
	17	15
	18	16
	Periosteal Surface	Periosteal Surface	546.29	20125.3		14565.523, 14171.505	0.083	4.76	89.41	90.72	74.04	70	81.0425

[truncated: 5 more sheets: Tibia MOR 1128, Tibia CCM V33.1.15, Tibia BDM 050, Femur TMP 1986.144.0001, Tibia TMP 1994.012.0602]
