# Supplementary material for: Prolonged growth and extended subadult development in the Tyrannosaurus rex species complex revealed by expanded histological sampling and statistical modeling
Source: PeerJ. 2026 Jan 14;14:e20469. doi: 10.7717/peerj.20469 (PMC12811967; doi:10.7717/peerj.20469)
Supplement: Supplemental Information 28 — The models fit to conventional (arithmetic scale) data are modified for fitting to log-transformed data, in which the circumference values are log-transformed. Here we use log to mean natural logarithm. Parameter interpretation is as described for arithmetic scale models. The Laplace 3 model (Table S2) is not included because it has algorithmic issues in fitting. [file peerj-14-20469-s028.docx]

**Table S4:**

**Models fit to log-transformed growth data.**

The models fit to conventional (arithmetic scale) data are modified for fitting to log-transformed data, in which the circumference values are log-transformed. Here we use log to mean natural logarithm. Parameter interpretation is as described for arithmetic scale models. The Laplace 3 model (Table S2) is not included because it has algorithmic issues in fitting.

| **Name** | **Equation** |
| --- | --- |
| Linear 2 |  |
| Quadratic 3 |  |
| Log Linear 2 |  |
| Log Quadratic 3 |  |
| Log Logistic 3 |  |
| Log Gompertz 3 |  |
| Log Extreme Value 3 |  |
| Log Erfc 3 |  |
| Log Arctan 3 |  |
| Log Sech 3 |  |
| Log Moyal 3 |  |
| Log Tanh 3 |  |
